# Supplementary material
Source: publisher figshare collection journal article supplement (https://acs.figshare.com/ndownloader/files/3973690)
Supplement: Supplementary file 1 [file 3973690]

## **Supporting Information.**

# Iridium- and platinum-free ring opening of indan

*Jing Shen and Natalia Semagina\**

Department of Chemical and Materials Engineering, University of Alberta, 9107-116 St.  
Edmonton, Alberta T6G 2V4 Canada

*\*corresponding author. Phone: 1-780-492-2293, fax: 1-780-492-2881, e-mail:  
semagina@ualberta.ca*

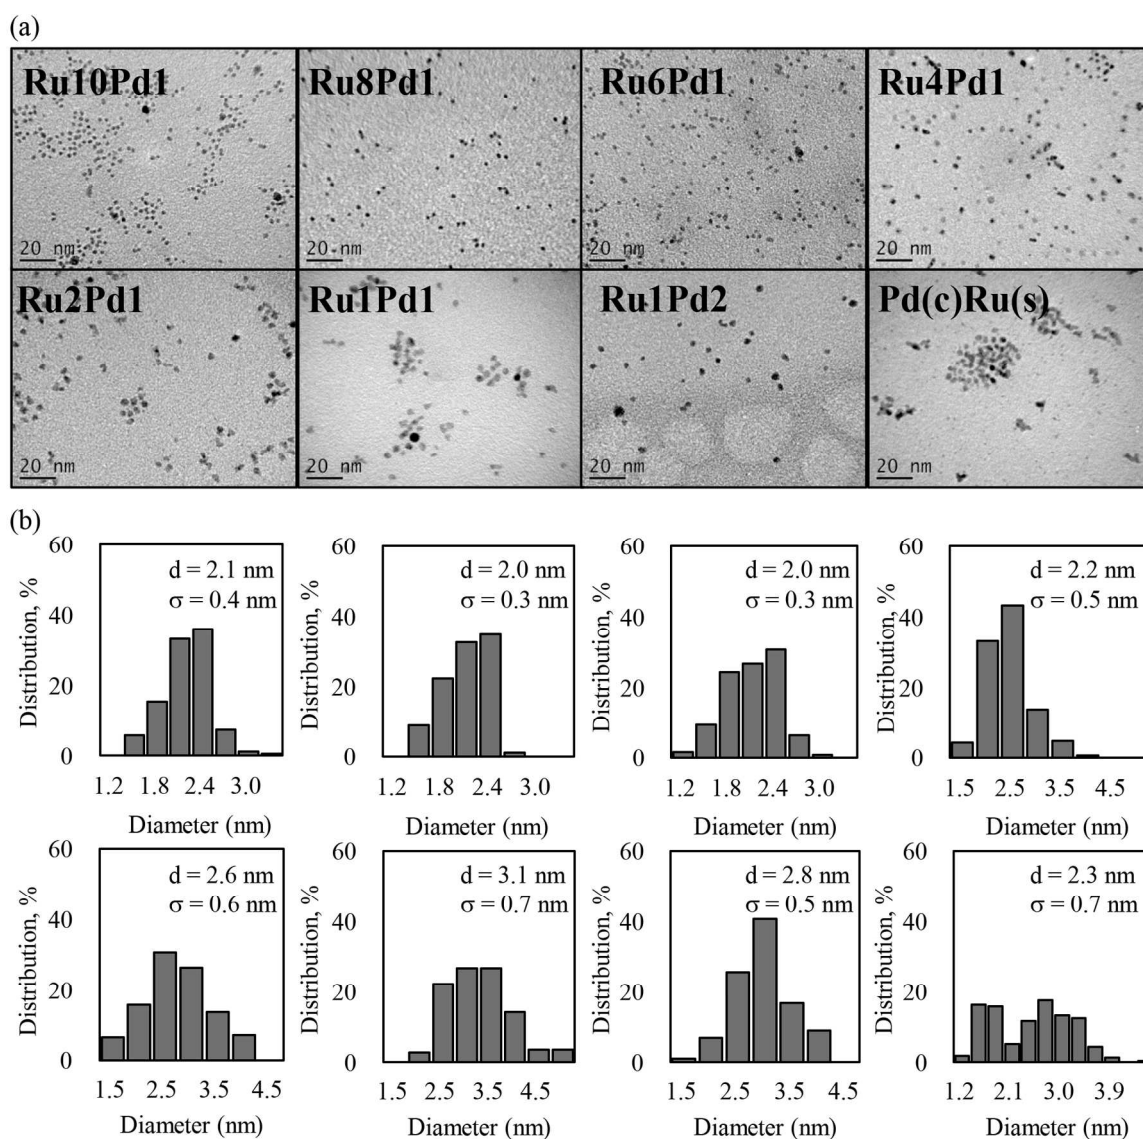

**Figure S1.** TEM images of PVP-stabilized bimetallic Ru-Pd colloids (the scale bar is 20 nm) and corresponding size distribution histograms

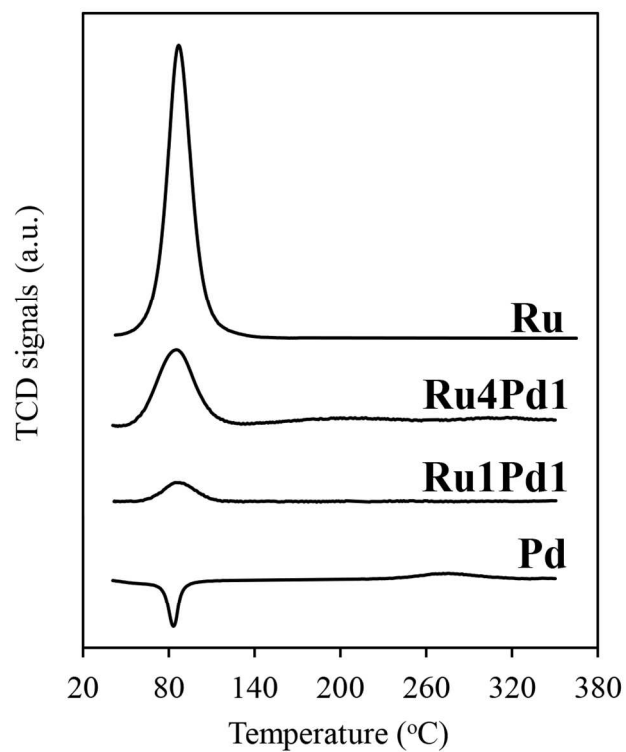

**Figure S2.** TPR profiles of selected mono- and bimetallic Ru-Pd catalysts in H<sub>2</sub>/Ar flow (the TCD signal is inverted so that the positive peaks correspond to hydrogen consumption)
